# Supplementary material
Source: PubMed Central journal article supplement (PMC6529278)
Supplement: NIHMS1525905-supplement-1.pdf [file NIHMS1525905-supplement-1.pdf]

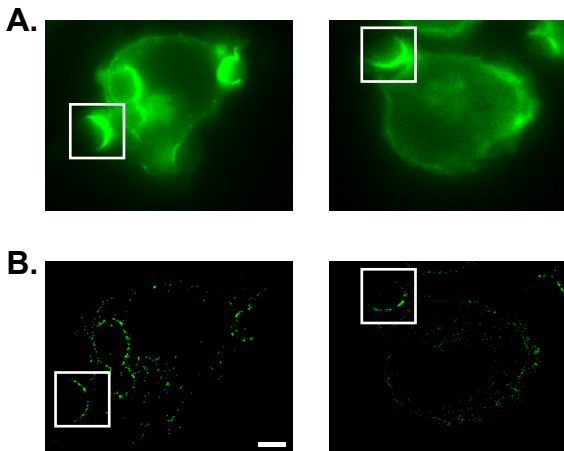

**Supplement Figure 1.** Visualization of Dectin-1 using spinning disk confocal microscopy (**A**) and STORM (**B**). Greater resolution of STORM allows for individual Dectin-1 clusters to be seen within the phagocytic cup. Scale bar is 5  $\mu\text{m}$ .
